# Supplementary material
Source: ML conference proceedings conference paper supplement (https://proceedings.mlr.press/v130/liu21h.html)
Supplement: Supplementary file 1 [file liu21h-supp.pdf]

## A Omitted proofs

### A.1 Omitted proof of Lemma 4 (mixing coefficient)

We finish the proof of lemma 4 by proving  $\beta_{S_X}(2i\eta) = \beta_{L_{\tilde{X}}}(2i\eta)$ :

$$\begin{aligned}
 \beta_{S_X}(2i\eta) &= \frac{1}{2} \int \left| \pi(\mathbf{x}_0, \mathbf{x}'_0) \pi(\mathbf{x}_{2i\eta}, \mathbf{x}'_{2i\eta}) \right. \\
 &\quad \left. - \pi(\mathbf{x}_0, \mathbf{x}'_0) p(\mathbf{x}_{2i\eta}, \mathbf{x}'_{2i\eta} | \mathbf{x}_0, \mathbf{x}'_0) \right| \\
 &= \frac{1}{2} \int \pi(\mathbf{x}_0, \mathbf{x}'_0) \cdot \left| \pi(\mathbf{x}_{2i\eta}, \mathbf{x}'_{2i\eta}) - p(\mathbf{x}_{2i\eta}, \mathbf{x}'_{2i\eta} | \mathbf{x}_0, \mathbf{x}'_0) \right| \\
 &= \frac{1}{2} \int \left( \frac{1}{2} \pi(\mathbf{x}_0) (p(\mathbf{x}'_0 | \mathbf{x}_0) + \pi(\mathbf{x}'_0)) \right) \\
 &\quad \cdot \left( \frac{1}{2} \left| \pi(\mathbf{x}_{2i\eta}) - p(\mathbf{x}_{2i\eta} | \mathbf{x}_0) \right| (p(\mathbf{x}'_{2i\eta} | \mathbf{x}_{2i\eta}) + \pi(\mathbf{x}'_{2i\eta})) \right) \\
 &= \frac{1}{8} \int_{\mathbf{x}_0, \mathbf{x}_{2i\eta}} \pi(\mathbf{x}_0) \left| \pi(\mathbf{x}_{2i\eta}) - p(\mathbf{x}_{2i\eta} | \mathbf{x}_0) \right| \\
 &\quad \cdot \int_{\mathbf{x}'_0} (p(\mathbf{x}'_0 | \mathbf{x}_0) + \pi(\mathbf{x}'_0)) \cdot \int_{\mathbf{x}'_{2i\eta}} (p(\mathbf{x}'_{2i\eta} | \mathbf{x}_{2i\eta}) + \pi(\mathbf{x}'_{2i\eta})) \\
 &= \frac{1}{2} \int_{\mathbf{x}_0, \mathbf{x}_{2i\eta}} \pi(\mathbf{x}_0) \left| \pi(\mathbf{x}_{2i\eta}) - p(\mathbf{x}_{2i\eta} | \mathbf{x}_0) \right| \\
 &= \frac{1}{2} \int_{\tilde{\mathbf{x}}_0, \tilde{\mathbf{x}}_{2i\eta}} \pi(\tilde{\mathbf{x}}_0) \left| \pi(\tilde{\mathbf{x}}_{2i\eta}) - p(\tilde{\mathbf{x}}_{2i\eta} | \mathbf{x}_0) \right| = \beta_{L_{\tilde{X}}}(2i\eta).
 \end{aligned} \tag{32}$$

### A.2 Omitted calculations for Theorem 1 (sample complexity)

We now provide the calculation details for Theorem 1.

By lemma 2, and recall the empirical Rademacher complexity is  $\mathfrak{R}_\mu = O\left(K_\eta(\mathcal{H})\sqrt{\log \mu/\mu}\right)$ , we need to choose  $T, \mu$  such that

$$C \sqrt{\frac{1}{\mu}} \left( K_\eta(\mathcal{H})\sqrt{\log \mu} + \sqrt{-\log(\delta - \Delta_{appr})} \right) \leq \Delta_{gen} \tag{33}$$

where  $\Delta_{appr}^\mu := O\left(\frac{B}{\sqrt{T}}\mu^{\frac{3}{2}}\right)$  by lemma 3.

We would like to control  $\Delta_{appr}^\mu = O(\delta)$ . Substituting in the choice of  $T = \Omega\left(\frac{B^2 K_\eta(\mathcal{H})^3}{\delta^2 \Delta_{gen}^3} \left(\log \frac{1}{\delta}\right)^{\frac{3}{2}}\right)$ , we have

$$\Delta_{appr}^\mu = O\left(\frac{B\delta\Delta_{gen}^{3/2}}{BK_\eta(\mathcal{H})^{3/2}} \left(\log \frac{1}{\delta}\right)^{-3/2} \cdot \mu^{3/2}\right) = O(\delta) \tag{34}$$

which is satisfied by setting  $\mu = \Theta\left(\frac{K_\eta(\mathcal{H})\sqrt{\log(1/(\delta - \Delta_{appr}))}}{\Delta_{gen}}\right)$ .

### A.3 Omitted calculations of Theorem 3 (guarantee on $p^\eta$ )

Recall that  $c_*, C_*$  and  $\hat{c}, \hat{C}$  are the constants in lemma 6 for  $p_*^\eta$  and  $p^\eta$  respectively. Denote  $c := \max\{c_*, \hat{c}\}$ ,  $C_u = \max\{C_*, \hat{C}\}$ ,  $C_l = \min\{C_*, \hat{C}\}$ .

We now show the omitted calculations for equation 31 in the proof of Theorem 3.

$$\begin{aligned}
 & \mathbb{E}_{\mathbf{x}, \mathbf{x}'} \frac{(\max\{p^\eta, p_*^\eta\} + q)^4}{q^2} \\
 & \leq \mathbb{E}_{\mathbf{x}, \mathbf{x}'} Z_\sigma^2 \exp\left(\frac{1}{\sigma^2} \|\mathbf{x} - \mathbf{x}'\|^2\right) \cdot \left(\frac{c}{\eta^{d/2}} \exp(C_u \eta \|\mathbf{x}\|^2) + \frac{1}{Z_\sigma}\right)^4 \exp\left(-\frac{4}{C_l \eta} \|\mathbf{x} - \mathbf{x}'\|^2\right) \\
 & \leq \mathbb{E}_{\mathbf{x}} Z_\sigma^2 \left(\frac{c}{\eta^{d/2}} \exp(C_u \eta \|\mathbf{x}\|^2) + \frac{1}{Z_\sigma}\right)^4 \mathbb{E}_{\mathbf{x}'} \exp\left(-\frac{2}{C_l \eta} \|\mathbf{x} - \mathbf{x}'\|^2\right) \\
 & \leq \mathbb{E}_{\mathbf{x}} \frac{c Z_\sigma^2}{\eta^{d/2}} \left(\frac{c}{\eta^{d/2}} \exp(C_l \eta \|\mathbf{x}\|^2) + (\pi C_l \eta)^{-\frac{d}{2}}\right)^4 \exp(C_u \eta \|\mathbf{x}\|^2) \int_{\mathbf{x}'} \exp\left(-\frac{3}{C_l \eta} \|\mathbf{x} - \mathbf{x}'\|^2\right) \\
 & \leq \frac{c Z_\sigma^2}{\eta^{5d/2}} \left(\frac{2\pi C_l \eta}{3}\right)^{\frac{d}{2}} \mathbb{E}_{\mathbf{x}} \left(c \exp(C_u \eta \|\mathbf{x}\|^2) + (\pi C_l)^{-\frac{d}{2}}\right)^4 \exp(C_u \eta \|\mathbf{x}\|^2) \\
 & \leq c \left(\frac{2\pi^3 C_2^3}{\eta^2}\right)^{d/2} \exp(-f(\mathbf{x}_*)) \int_{\mathbf{x}} \left(c \exp(C_u \eta \|\mathbf{x}\|^2) + (\pi C_l)^{-\frac{d}{2}}\right)^4 \exp\left(-\left(\frac{\rho}{2} - C_u \eta\right) \|\mathbf{x}\|^2\right) \\
 & \leq 16c\pi(\mathbf{x}_*) \left(\frac{2\pi^3 C_l^3}{\eta^2}\right)^{d/2} \left[c^4 \left(\frac{\rho}{2} - 5C_1 \eta\right)^{-\frac{d}{2}} + (\pi C_l)^{-2d} \left(\frac{\rho}{2} - C_u \eta\right)^{-\frac{d}{2}}\right] \\
 & \leq O\left(\pi(\mathbf{x}_*) \left(\frac{1}{\rho \eta^2}\right)^{d/2}\right).
 \end{aligned} \tag{35}$$

where  $C_1, C_2$  are constants introduced to simplify the notations.
